# Supplementary material for: Shear induced gelation in a copper(ii) metallogel: new aspects of ion-tunable rheology and gel-reformation by external chemical stimuli
Source: Royal Society of Chemistry journal article supplement (doi:10.1039/c0sm00313a), 2010-01-01
Supplement: c0sm00313a.pdf [file c0sm00313a.pdf]

## Supporting Information

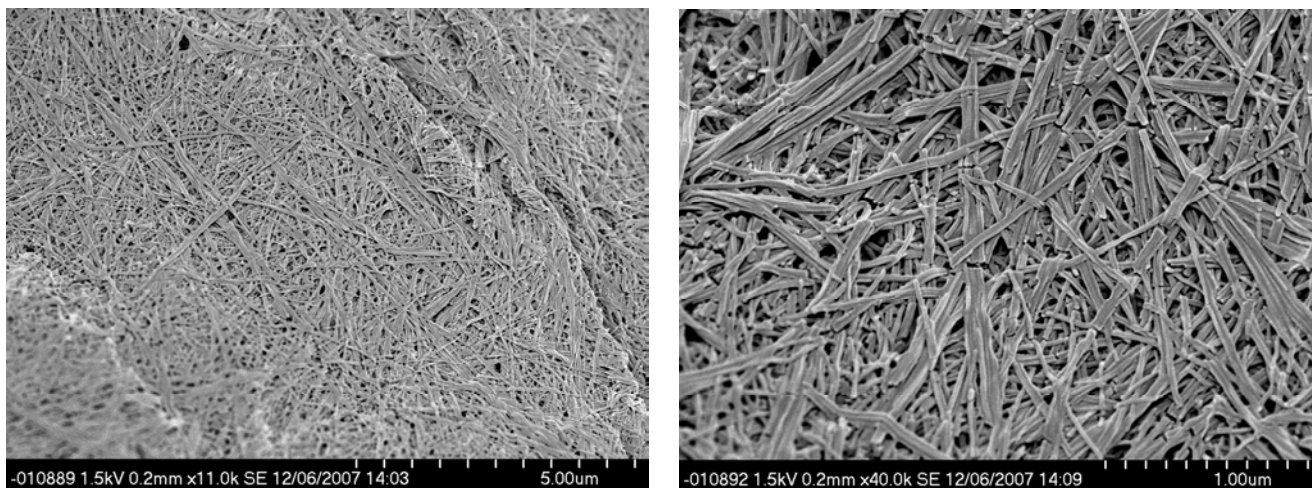

**S1.** SEM pictures of a  $\text{CuBr}_2$  xerogel with **1** from a 1 wt% gel in MeOH after addition of 0.35 equivalents  $\text{CuBr}_2$ .

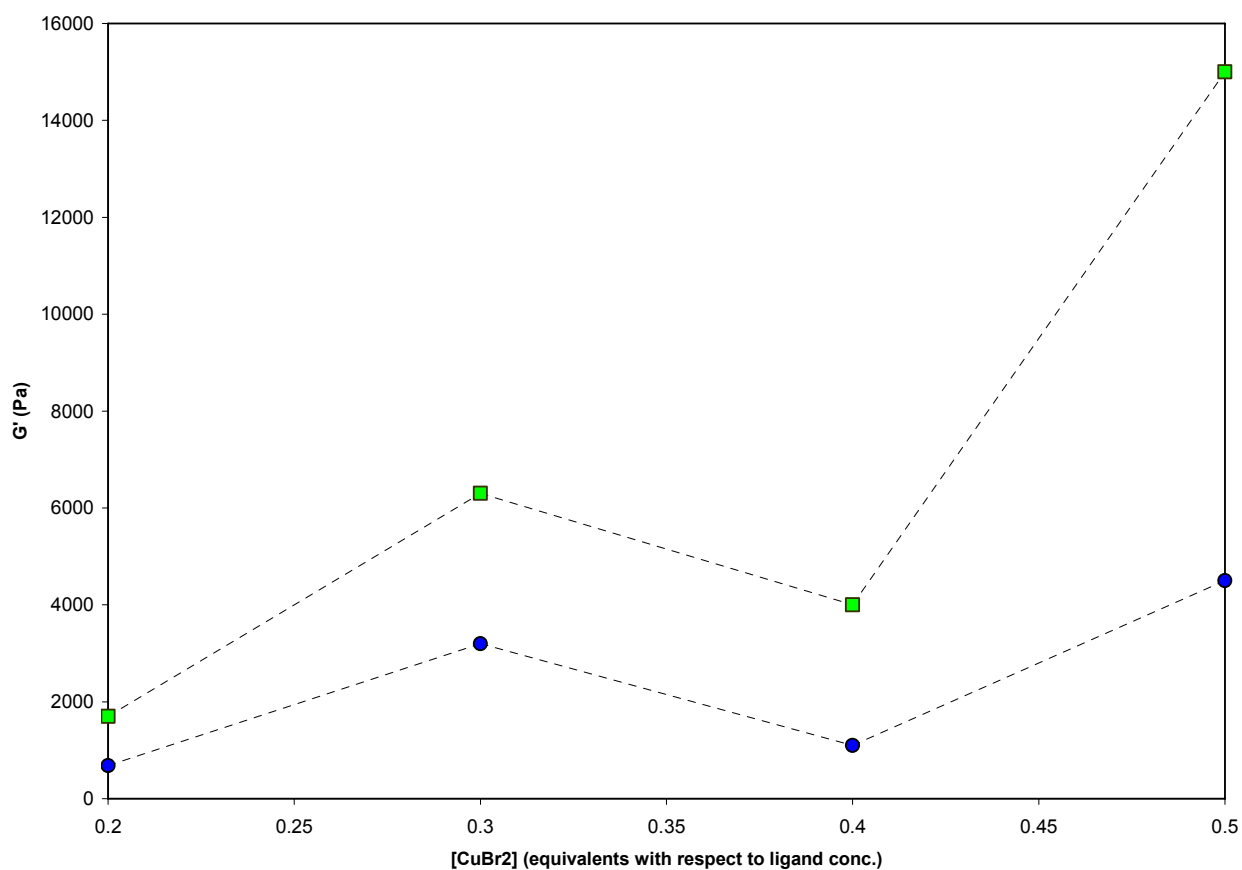

**S2.** Gel strengthening in samples of ligand **1** with 0.2, 0.3, 0.4, and 0.5 equiv. of  $\text{CuBr}_2$ .  $G'$  is measured immediately (blue circles) and 1 week after shaking (green squares).

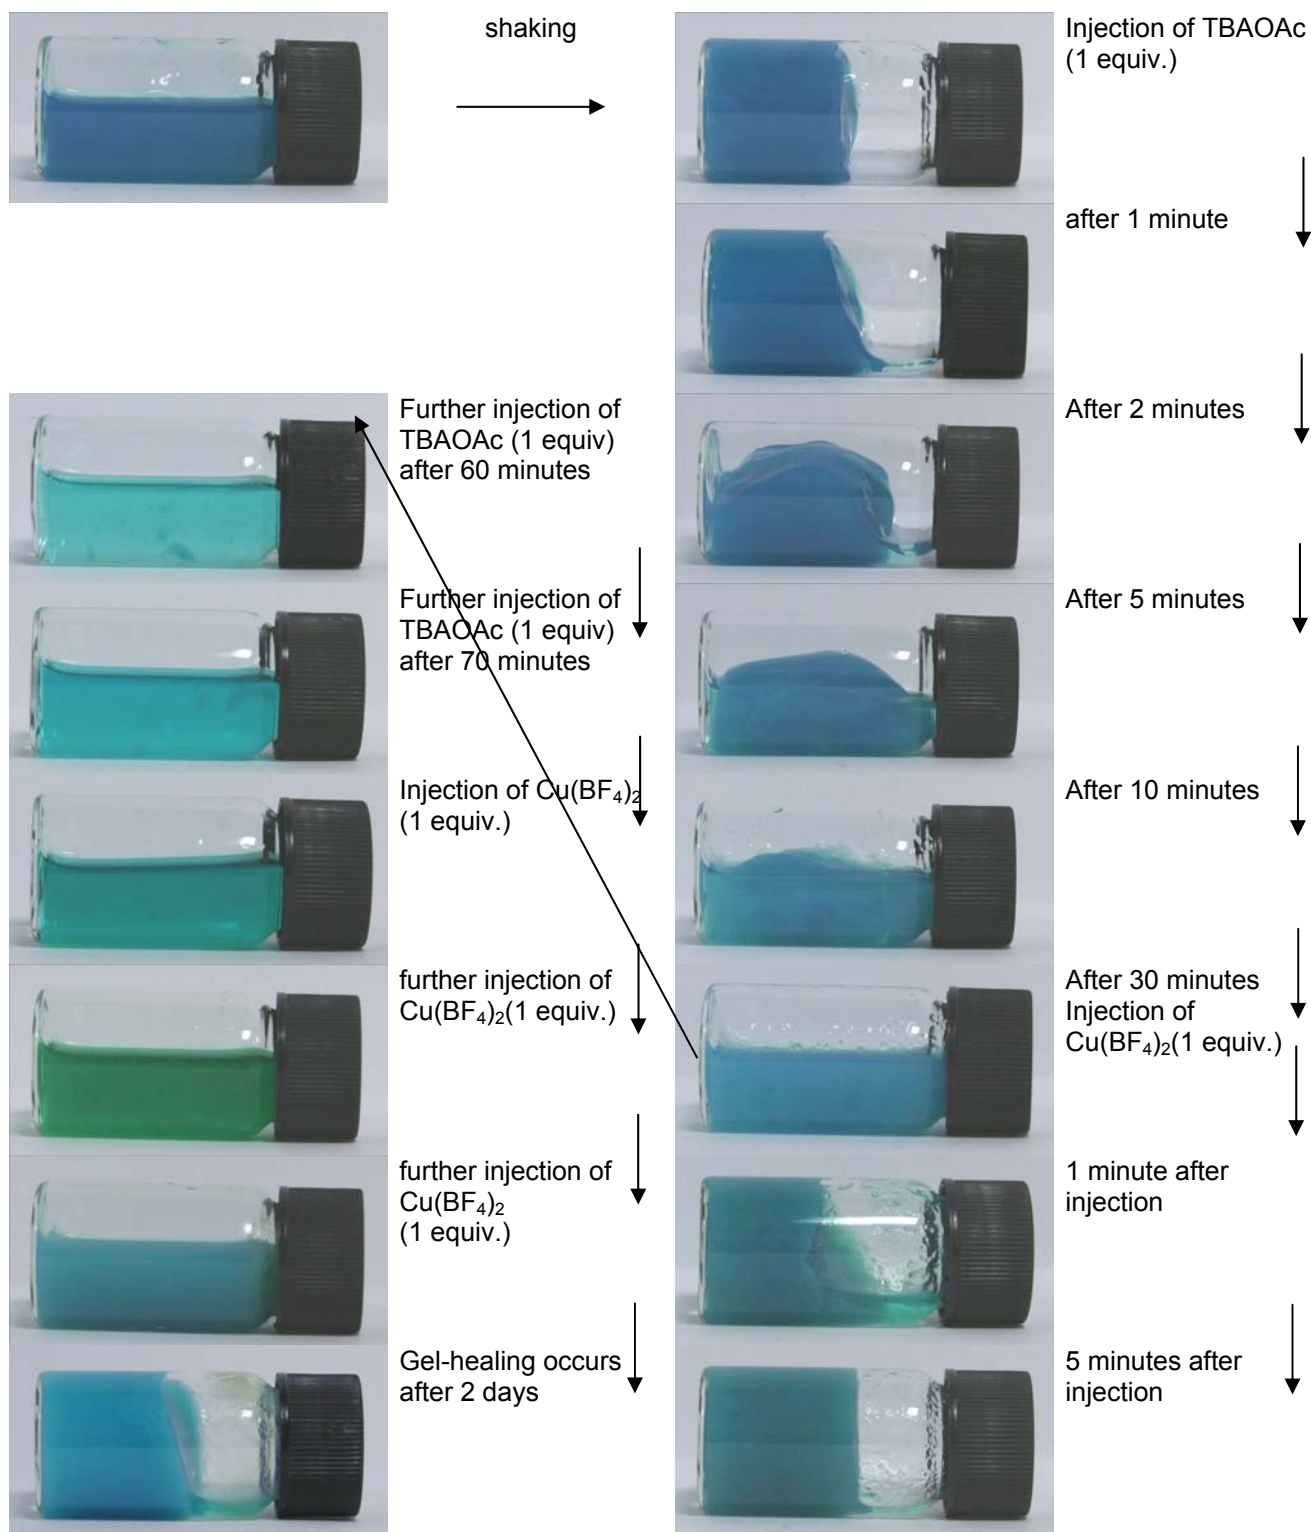

**S3.** Full sequence of gel-break up by acetate addition and gel-reformation by subsequent copper salt addition. The gels are made from ligand **1** (1 weight %) after the addition of 0.3 equiv.  $\text{CuBr}_2$  in MeOH.
